# Supplementary material for: Synthesis of Metal Nanoparticles via Pulicaria undulata and an Evaluation of Their Antimicrobial, Antioxidant, and Cytotoxic Activities
Source: MDPI journal article supplement (doi:10.3390/chemistry5040141), 2023-09-26
Supplement: s1 [file s1]

## Article

# Synthesis of Metal Nanoparticles via *Pulicaria undulata* and an Evaluation of Their Antimicrobial, Antioxidant, and Cytotoxic Activities

Yasser A. El-Amier <sup>1,\*</sup>, Balsam T. Abduljabbar <sup>1</sup>, Mustafa M. El-Zayat <sup>2,3</sup>, Tushar C. Sarker <sup>4</sup>, and Ahmed M. Abd-ElGawad <sup>5</sup>

<sup>1</sup> Botany Department, Faculty of Science, Mansoura University, Mansoura 35516, Egypt; yasran@mans.edu.eg (Y.A.E.-A), Dr.Balsamtareq@gmail.com (B.T.A.)

<sup>2</sup> Department of Biology, Faculty of Science, New Mansoura University, New Mansoura City 35511, Egypt; mustafa.mohsen@nmu.edu.eg

<sup>3</sup> Unit of Genetic Engineering and Biotechnology, Mansoura University, Mansoura 35516, Egypt;

<sup>4</sup> Texas A&M AgriLife Research Center, Overton, TX 75684, USA, tushar.sarker@ag.tamu.edu

<sup>5</sup> Plant Production Department, College of Food & Agriculture Sciences, King Saud University, P.O. Box 2460 Riyadh 11451, Saudi Arabia, aibrahim2@ksu.edu.sa

\* Correspondence: yasran@mans.edu.eg; Tel.: (+201017229120)

**Citation:** El-Amier, Y.A.; Abduljabbar, B.T.; El-Zayat, M.M.; Sarker, T.C.; Abd-ElGawad, A.M. Synthesis of Metal Nanoparticles via *Pulicaria undulata* and an Evaluation of Their Antimicrobial, Antioxidant, and Cytotoxic Activities. *Chemistry* **2023**, *5*, 2075–2077. <https://doi.org/10.3390/chemistry5040141>

Academic Editor: Sofia Lima

Received: 8 August 2023

Revised: 16 September 2023

Accepted: 25 September 2023

Published: 26 September 2023

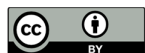

**Copyright:** © 2023 by the authors. Licensee MDPI, Basel, Switzerland. This article is an open access article distributed under the terms and conditions of the Creative Commons Attribution (CC BY) license (<https://creativecommons.org/licenses/by/4.0/>).

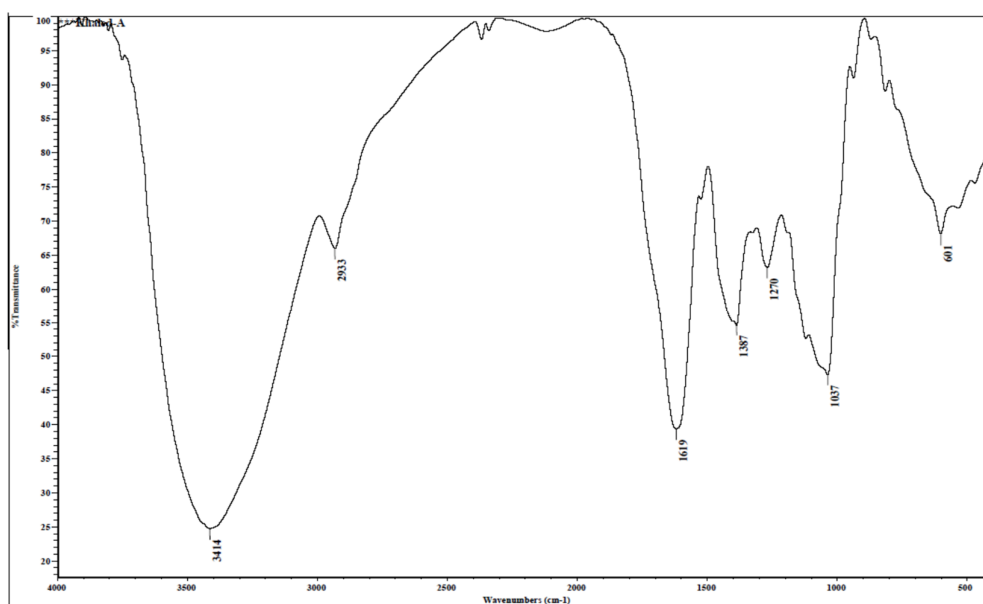

Figure S1. The FT-IR spectral chart of *P. undulata* extract.

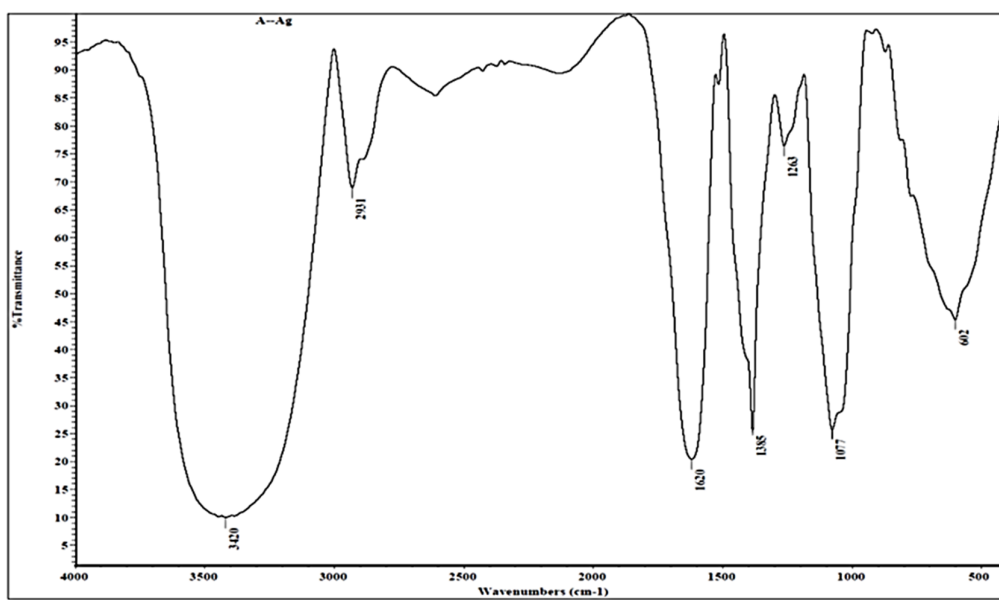

Figure S2. The FT-IR spectral chart of *P. undulata* extract-Ag NPs.

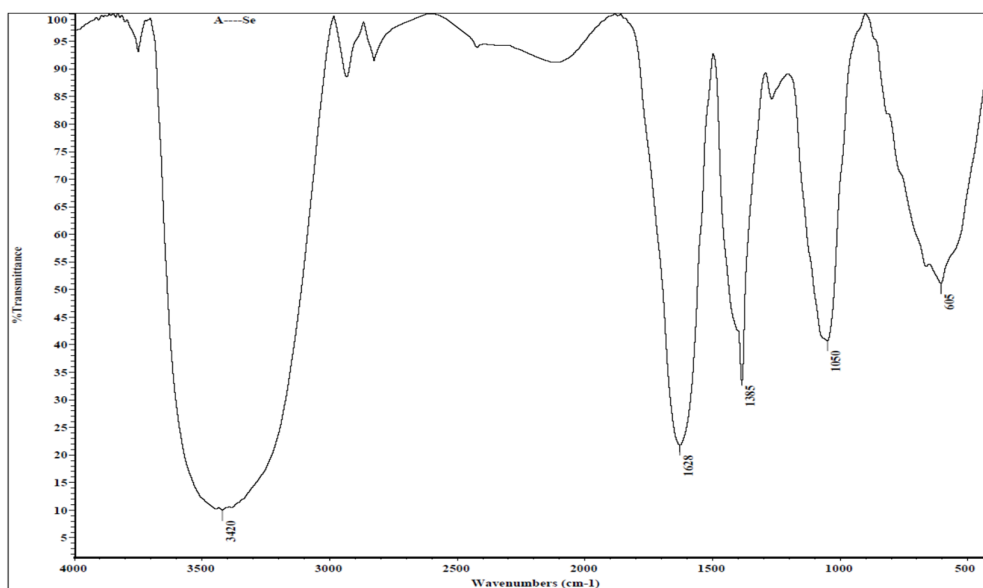

Figure S3. The FT-IR spectral chart of *P. undulata* extract -SeO<sub>2</sub> NPs.

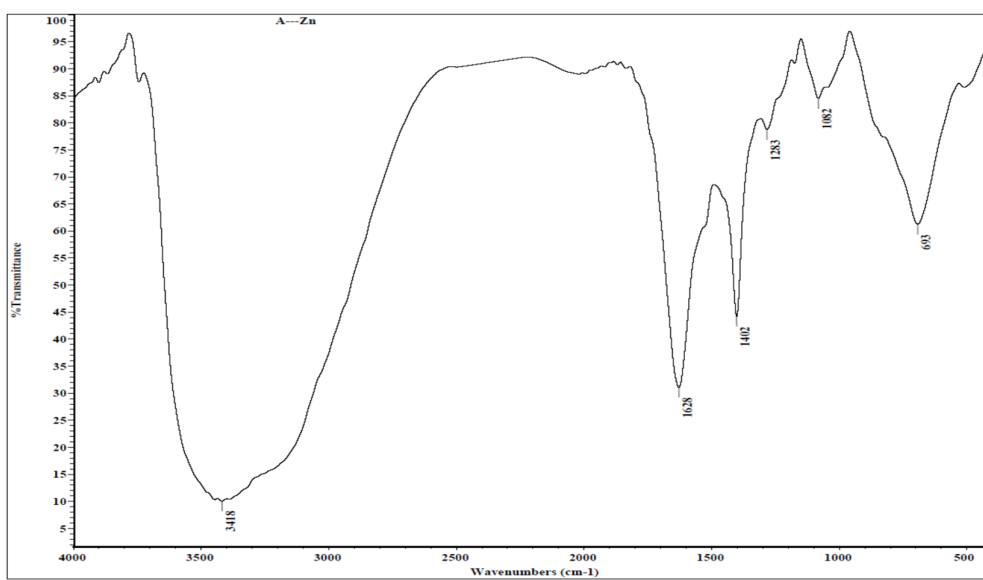

Figure S4. The FT-IR spectral chart of *P. undulata* extract -ZnO NPs.
